# Supplementary material for: Physicochemical Properties and Biological Activities of Garden Cress (Lepidium sativum L.) Seed and Leaf Oil Extracts
Source: Hindawi journal article supplement (doi:10.1155/2022/2947836), 2022-03-16
Supplement: f1 [file 2947836.f1.pdf]

Table 1. Data for physicochemical properties and antioxidant activities

| Oil extract | rep | Oil yield | Spgr | Acv  | FFA  | PV  | DPPH | PVsc | AA    |
|-------------|-----|-----------|------|------|------|-----|------|------|-------|
| seed        | 1   | 27.5      | 0.92 | 1.4  | 0.71 | 2   | 10   | 38.4 | 26.36 |
| Seed        | 2   | 24        | 0.79 | 1.12 | 0.56 | 2.4 | 11   | 37.8 | 22.06 |
| Leaf        | 1   | 15.5      | 0.51 | 2.81 | 1.41 | 8   | 26.7 | 32   | 17.5  |
| Leaf        | 2   | 14.5      | 0.48 | 3.09 | 1.55 | 7   | 26.4 | 32.7 | 17.85 |

Spgr: specific gravity; ACV: acid value; FFA: free fatty acid value; PV: peroxide value; DPPH: 2, 2- diphenyl-1-picrylhydrazyl; PVSC: peroxide scavenging activity; AA: ascorbic acid.

Table 2. Data for antibacterial activity based on diameter of zone of inhibition

| Test patho | Oil extract | rep | Concentrations of the oil extract (+ Ciprofloxacin) |        |        |          |
|------------|-------------|-----|-----------------------------------------------------|--------|--------|----------|
|            |             |     | 1µl/ml                                              | 2µl/ml | 3µl/ml | (1µl/ml) |
| E. coli    | Seed        | 1   | 13.5                                                | 15     | 16     | 18.5     |
| E. coli    | Seed        | 2   | 14                                                  | 14.5   | 15.5   | 18.5     |
| E. coli    | Seed        | 3   | 13                                                  | 14     | 15.1   | 18       |
| E. coli    | Leaf        | 1   | 14                                                  | 15     | 17     | 19       |
| E. coli    | Leaf        | 2   | 13.5                                                | 15.5   | 18     | 18.5     |
| E. coli    | Leaf        | 3   | 14.2                                                | 15.2   | 17.5   | 18       |
| S. aureus  | Seed        | 1   | 15                                                  | 15.5   | 17     | 18       |
| S. aureus  | Seed        | 2   | 14.5                                                | 16     | 17.5   | 18.5     |
| S. aureus  | Seed        | 3   | 14.2                                                | 16.1   | 17.2   | 19       |
| S. aureus  | Leaf        | 1   | 15                                                  | 17.5   | 18     | 18.5     |
| S. aureus  | Leaf        | 2   | 16                                                  | 18     | 18.5   | 18       |
| S. aureus  | Leaf        | 3   | 15.5                                                | 18.2   | 19     | 19       |

Table 3. Data for antifungal activity

| Test patho  | Oil extract | Rep | Concentration of the oil extract |        |        | Fulconazole<br>(1µl/ml) |
|-------------|-------------|-----|----------------------------------|--------|--------|-------------------------|
|             |             |     | 1µl/ml                           | 2µl/ml | 3µl/ml |                         |
| C. albicans | Seed        | 1   | 9                                | 10.5   | 12     | 20                      |
| C. albicans | Seed        | 2   | 10                               | 11     | 13     | 18.5                    |
| C. albicans | Seed        | 3   | 8                                | 10.2   | 13.6   | 19.5                    |
| C. albicans | Leaf        | 1   | 14                               | 15.5   | 18     | 18                      |
| C. albicans | Leaf        | 2   | 13.5                             | 15     | 18.5   | 19.5                    |
| C. albicans | Leaf        | 3   | 13                               | 14.5   | 17.5   | 19                      |
| A. niger    | seed        | 1   | 8                                | 10     | 13     | 18                      |
| A. niger    | seed        | 2   | 7                                | 9      | 12     | 19.5                    |
| A. niger    | seed        | 3   | 8.2                              | 19.4   | 12.7   | 18                      |
| A. niger    | Leaf        | 1   | 13                               | 16     | 18     | 18.5                    |
| A. niger    | Leaf        | 2   | 14                               | 16.5   | 18.5   | 19.5                    |
| A. niger    | leaf        | 3   | 13.5                             | 17     | 19     | 19                      |
